# Supplementary material
Source: publisher figshare collection journal article supplement (https://acs.figshare.com/ndownloader/files/5322415)
Supplement: Supplementary file 1 [file 5322415]

 
data_jar365 
 
_audit_creation_method            SHELXL-97 
_chemical_name_systematic 
; 
 ? 
; 
_chemical_name_common             ? 
_chemical_melting_point           ? 
_chemical_formula_moiety          'C23 H36 Ag2 N6 O5 P2, 6(H2 O)'
_chemical_formula_sum 
 'C23 H48 Ag2 N6 O11 P2' 
_chemical_formula_weight          862.35 
 
loop_ 
 _atom_type_symbol 
 _atom_type_description 
 _atom_type_scat_dispersion_real 
 _atom_type_scat_dispersion_imag 
 _atom_type_scat_source 
 'C'  'C'   0.0033   0.0016 
 'International Tables Vol C Tables 4.2.6.8 and 6.1.1.4' 
 'H'  'H'   0.0000   0.0000 
 'International Tables Vol C Tables 4.2.6.8 and 6.1.1.4' 
 'N'  'N'   0.0061   0.0033 
 'International Tables Vol C Tables 4.2.6.8 and 6.1.1.4' 
 'O'  'O'   0.0106   0.0060 
 'International Tables Vol C Tables 4.2.6.8 and 6.1.1.4' 
 'P'  'P'   0.1023   0.0942 
 'International Tables Vol C Tables 4.2.6.8 and 6.1.1.4' 
 'Ag'  'Ag'  -0.8971   1.1015 
 'International Tables Vol C Tables 4.2.6.8 and 6.1.1.4' 
 
_symmetry_cell_setting            monoclinic 
_symmetry_space_group_name_H-M    'P 21/c' 
_symmetry_space_group_name_Hall   '-P 2ybc'

 
loop_ 
 _symmetry_equiv_pos_as_xyz 
 'x, y, z' 
 '-x, y+1/2, -z+1/2' 
 '-x, -y, -z' 
 'x, -y-1/2, z-1/2' 
 
_cell_length_a                    6.8485(2) 
_cell_length_b                    27.3531(7) 
_cell_length_c                    17.0824(5) 
_cell_angle_alpha                 90.00 
_cell_angle_beta                  91.6310(10) 
_cell_angle_gamma                 90.00 
_cell_volume                      3198.71(16) 
_cell_formula_units_Z             4 
_cell_measurement_temperature     150(2) 
_cell_measurement_reflns_used    9247
_cell_measurement_theta_min        2.39
_cell_measurement_theta_max       26.36

_exptl_crystal_description       'block'
_exptl_crystal_colour            'colourless'
_exptl_crystal_size_min          0.22
_exptl_crystal_size_mid          0.35
_exptl_crystal_size_max          0.43
_exptl_crystal_density_meas       ? 
_exptl_crystal_density_diffrn     1.791 
_exptl_crystal_density_method     'not measured' 
_exptl_crystal_F_000              1760 
_exptl_absorpt_coefficient_mu     1.389 
_exptl_absorpt_correction_type    multi-scan 
_exptl_absorpt_correction_T_min   0.6 
_exptl_absorpt_correction_T_max   0.8 
_exptl_absorpt_process_details    sadabs 

 
_exptl_special_details 
; 
 ? 
; 
 
_diffrn_ambient_temperature       150(2) 
_diffrn_radiation_wavelength      0.71069 
_diffrn_radiation_type            MoK\a 
_diffrn_radiation_source          'fine-focus sealed tube' 
_diffrn_radiation_monochromator   graphite 
_diffrn_measurement_device_type  'Bruker APEX-II CCD'
_diffrn_measurement_method       '\f and \w scans'
_diffrn_detector_area_resol_mean  ? 
_diffrn_standards_number          ? 
_diffrn_standards_interval_count  ? 
_diffrn_standards_interval_time   ? 
_diffrn_standards_decay_%         ? 
_diffrn_reflns_number             28223 
_diffrn_reflns_av_R_equivalents   0.0289 
_diffrn_reflns_av_sigmaI/netI     0.0231 
_diffrn_reflns_limit_h_min        -6 
_diffrn_reflns_limit_h_max        8 
_diffrn_reflns_limit_k_min        -31 
_diffrn_reflns_limit_k_max        32 
_diffrn_reflns_limit_l_min        -20 
_diffrn_reflns_limit_l_max        20 
_diffrn_reflns_theta_min          2.81 
_diffrn_reflns_theta_max          25.35 
_reflns_number_total              5857 
_reflns_number_gt                 5795 
_reflns_threshold_expression      >2sigma(I) 
 
_computing_data_collection      'Bruker APEX2'
_computing_cell_refinement      'Bruker SAINT'
_computing_data_reduction       'Bruker SAINT' 
_computing_structure_solution   'SHELXS-97 (Sheldrick, 2008)'
_computing_structure_refinement 'SHELXL-97 (Sheldrick, 2008)'
_computing_molecular_graphics   'Bruker SHELXTL'
_computing_publication_material 'Bruker SHELXTL'

 
_refine_special_details 
; 
 Refinement of F^2^ against ALL reflections.  The weighted R-factor wR and 
 goodness of fit S are based on F^2^, conventional R-factors R are based 
 on F, with F set to zero for negative F^2^. The threshold expression of 
 F^2^ > 2sigma(F^2^) is used only for calculating R-factors(gt) etc. and is 
 not relevant to the choice of reflections for refinement.  R-factors based 
 on F^2^ are statistically about twice as large as those based on F, and R- 
 factors based on ALL data will be even larger. 

 There is a high positive residual density of 3.89 e �-3 near the N21 atom 
 which could not be corrected. The atom is correctely assigned and no twin
 law could be found.
; 
 
_refine_ls_structure_factor_coef  Fsqd  
_refine_ls_matrix_type            full 
_refine_ls_weighting_scheme       calc  
_refine_ls_weighting_details 
 'calc w=1/[\s^2^(Fo^2^)+(0.0000P)^2^+27.8073P] where P=(Fo^2^+2Fc^2^)/3' 
_atom_sites_solution_primary      direct 
_atom_sites_solution_secondary    difmap 
_atom_sites_solution_hydrogens    geom 
_refine_ls_hydrogen_treatment     mixed 
_refine_ls_extinction_method      none 
_refine_ls_extinction_coef        ? 
_refine_ls_number_reflns          5857 
_refine_ls_number_parameters      409 
_refine_ls_number_restraints      6 
_refine_ls_R_factor_all           0.0517 
_refine_ls_R_factor_gt            0.0512 
_refine_ls_wR_factor_ref          0.1076 
_refine_ls_wR_factor_gt           0.1074 
_refine_ls_goodness_of_fit_ref    1.330 
_refine_ls_restrained_S_all       1.330 
_refine_ls_shift/su_max           0.003 
_refine_ls_shift/su_mean          0.000 
 
loop_ 
 _atom_site_label 
 _atom_site_type_symbol 
 _atom_site_fract_x 
 _atom_site_fract_y 
 _atom_site_fract_z 
 _atom_site_U_iso_or_equiv 
 _atom_site_adp_type 
 _atom_site_occupancy 
 _atom_site_symmetry_multiplicity 
 _atom_site_calc_flag 
 _atom_site_refinement_flags 
 _atom_site_disorder_assembly 
 _atom_site_disorder_group 
C1 C 0.5688(8) 0.40399(19) 0.7321(3) 0.0106(11) Uani 1 1 d . . . 
C2 C 0.4840(8) 0.4209(2) 0.7993(3) 0.0146(11) Uani 1 1 d . . . 
H2 H 0.3509 0.4136 0.8082 0.017 Uiso 1 1 calc R . . 
C3 C 0.5893(9) 0.4485(2) 0.8542(3) 0.0183(12) Uani 1 1 d . . . 
H3 H 0.5275 0.4605 0.8994 0.022 Uiso 1 1 calc R . . 
C4 C 0.7849(9) 0.4583(2) 0.8428(3) 0.0210(13) Uani 1 1 d . . . 
H4 H 0.8582 0.4766 0.8806 0.025 Uiso 1 1 calc R . . 
C5 C 0.8724(9) 0.4416(2) 0.7767(4) 0.0195(13) Uani 1 1 d . . . 
H5 H 1.0065 0.4484 0.7691 0.023 Uiso 1 1 calc R . . 
C6 C 0.7673(8) 0.4148(2) 0.7209(3) 0.0161(12) Uani 1 1 d . . . 
H6 H 0.8291 0.4038 0.6751 0.019 Uiso 1 1 calc R . . 
C7 C 0.5478(8) 0.29090(19) 0.7307(3) 0.0118(11) Uani 1 1 d . . . 
C8 C 0.5374(8) 0.3234(2) 0.6585(3) 0.0127(11) Uani 1 1 d . . . 
H8A H 0.4577 0.3066 0.6174 0.015 Uiso 1 1 calc R . . 
H8B H 0.6710 0.3271 0.6386 0.015 Uiso 1 1 calc R . . 
C9 C 0.3036(8) 0.4444(2) 0.5868(3) 0.0132(11) Uani 1 1 d . . . 
C10 C 0.4347(8) 0.3999(2) 0.5912(3) 0.0150(11) Uani 1 1 d . . . 
H10A H 0.5673 0.4098 0.5759 0.018 Uiso 1 1 calc R . . 
H10B H 0.3858 0.3758 0.5522 0.018 Uiso 1 1 calc R . . 
C11 C 0.0058(8) 0.2451(2) 0.9078(3) 0.0132(11) Uani 1 1 d . . . 
H11A H 0.0095 0.2103 0.9235 0.016 Uiso 1 1 calc R . . 
H11B H 0.0096 0.2464 0.8500 0.016 Uiso 1 1 calc R . . 
C12 C 0.8308(8) 0.2725(2) 1.0449(3) 0.0137(11) Uani 1 1 d . . . 
H12A H 0.7280 0.2911 1.0717 0.016 Uiso 1 1 calc R . . 
H12B H 0.8290 0.2386 1.0648 0.016 Uiso 1 1 calc R . . 
C13 C 0.8285(8) 0.3365(2) 0.9181(3) 0.0148(11) Uani 1 1 d . . . 
H13A H 0.8266 0.3416 0.8607 0.018 Uiso 1 1 calc R . . 
H13B H 0.7257 0.3575 0.9402 0.018 Uiso 1 1 calc R . . 
C14 C 0.1834(8) 0.2677(2) 1.0286(3) 0.0148(11) Uani 1 1 d . . . 
H14A H 0.1764 0.2331 1.0449 0.018 Uiso 1 1 calc R . . 
H14B H 0.3090 0.2811 1.0492 0.018 Uiso 1 1 calc R . . 
C15 C 1.0296(9) 0.3457(2) 1.0370(3) 0.0166(12) Uani 1 1 d . . . 
H15A H 0.9188 0.3637 1.0592 0.020 Uiso 1 1 calc R . . 
H15B H 1.1517 0.3609 1.0576 0.020 Uiso 1 1 calc R . . 
C16 C 0.1796(8) 0.3230(2) 0.9186(3) 0.0146(11) Uani 1 1 d . . . 
H16A H 0.3055 0.3379 0.9357 0.017 Uiso 1 1 calc R . . 
H16B H 0.1697 0.3254 0.8608 0.017 Uiso 1 1 calc R . . 
C17 C 0.4514(8) 0.37458(19) 0.6711(3) 0.0107(11) Uani 1 1 d . . . 
H17 H 0.3163 0.3704 0.6908 0.013 Uiso 1 1 calc R . . 
C21 C 0.2473(8) 0.1327(2) 0.8601(3) 0.0171(12) Uani 1 1 d . . . 
H21A H 0.1358 0.1539 0.8441 0.021 Uiso 1 1 calc R . . 
H21B H 0.2480 0.1301 0.9179 0.021 Uiso 1 1 calc R . . 
C22 C 0.4414(8) 0.04504(19) 0.8435(3) 0.0136(11) Uani 1 1 d . . . 
H22A H 0.4511 0.0394 0.9007 0.016 Uiso 1 1 calc R . . 
H22B H 0.4505 0.0129 0.8172 0.016 Uiso 1 1 calc R . . 
C23 C 0.2460(8) 0.0870(2) 0.7172(3) 0.0160(12) Uani 1 1 d . . . 
H23A H 0.2469 0.0564 0.6862 0.019 Uiso 1 1 calc R . . 
H23B H 0.1364 0.1074 0.6970 0.019 Uiso 1 1 calc R . . 
C24 C 0.6059(8) 0.1238(2) 0.8598(3) 0.0153(12) Uani 1 1 d . . . 
H24A H 0.7283 0.1413 0.8479 0.018 Uiso 1 1 calc R . . 
H24B H 0.6058 0.1182 0.9170 0.018 Uiso 1 1 calc R . . 
C25 C 0.4333(8) 0.1605(2) 0.7473(3) 0.0151(12) Uani 1 1 d . . . 
H25A H 0.3182 0.1796 0.7290 0.018 Uiso 1 1 calc R . . 
H25B H 0.5515 0.1787 0.7323 0.018 Uiso 1 1 calc R . . 
C26 C 0.6007(8) 0.0840(2) 0.7344(3) 0.0144(11) Uani 1 1 d . . . 
H26A H 0.5971 0.0519 0.7078 0.017 Uiso 1 1 calc R . . 
H26B H 0.7222 0.1008 0.7195 0.017 Uiso 1 1 calc R . . 
N11 N 0.1819(6) 0.26993(15) 0.9412(2) 0.0068(8) Uani 1 1 d . . . 
N12 N 1.0230(7) 0.29465(17) 1.0644(3) 0.0136(10) Uani 1 1 d . . . 
N13 N 1.0210(7) 0.35140(17) 0.9515(3) 0.0143(10) Uani 1 1 d . . . 
N21 N 0.4315(7) 0.15708(19) 0.8370(3) 0.020 Uiso 1 1 d . . . 
N22 N 0.6068(7) 0.07607(17) 0.8200(3) 0.0128(9) Uani 1 1 d . . . 
N23 N 0.4311(7) 0.11334(17) 0.7064(3) 0.0154(10) Uani 1 1 d . . . 
O1 O 0.3923(6) 0.28170(15) 0.7646(2) 0.0179(9) Uani 1 1 d . . . 
O2 O 0.7134(6) 0.27414(15) 0.7527(2) 0.0173(9) Uani 1 1 d . . . 
O3 O 0.2351(6) 0.46111(15) 0.6481(2) 0.0179(9) Uani 1 1 d . . . 
O4 O 0.2713(6) 0.46185(15) 0.5188(2) 0.0215(9) Uani 1 1 d . . . 
O10 O 0.9284(6) 0.18826(15) 0.7254(2) 0.0198(9) Uani 1 1 d . . . 
O20 O 0.0466(6) 0.30779(16) 0.6822(3) 0.0227(9) Uani 1 1 d D . . 
O30 O 0.9764(7) 0.15315(16) 1.0323(3) 0.0289(11) Uani 1 1 d . . . 
O50 O 0.1603(7) 0.53948(16) 0.9276(3) 0.0278(10) Uani 1 1 d . . . 
O60 O 0.1821(6) 0.44501(16) 0.9800(3) 0.0244(10) Uani 1 1 d D . . 
O70 O 0.5158(7) 0.40164(17) 0.0458(2) 0.0245(10) Uani 1 1 d D . . 
P1 P 0.7743(2) 0.27206(5) 0.93912(8) 0.0120(3) Uani 1 1 d . . . 
P2 P 1.2066(2) 0.07223(5) 0.81902(9) 0.0155(3) Uani 1 1 d . . . 
Ag1 Ag 0.47801(6) 0.237940(15) 0.88529(2) 0.01236(11) Uani 1 1 d . . . 
Ag2 Ag 0.91786(6) 0.032637(16) 0.84894(3) 0.01835(12) Uani 1 1 d . . . 
O40 O 0.8675(6) 0.05483(15) 0.9971(3) 0.0227(9) Uani 1 1 d . . . 
H10C H 0.8560 0.2146 0.7380 0.034 Uiso 1 1 d . . . 
H10D H 0.9684 0.1975 0.6745 0.034 Uiso 1 1 d . . . 
H20A H -0.070(7) 0.294(3) 0.706(4) 0.034 Uiso 1 1 d D . . 
H20B H 0.150(8) 0.299(3) 0.721(3) 0.034 Uiso 1 1 d D . . 
H30A H 0.9370 0.1231 1.0232 0.034 Uiso 1 1 d . . . 
H30B H 1.0297 0.1590 1.0805 0.034 Uiso 1 1 d . . . 
H50A H 0.1502 0.5065 0.9379 0.034 Uiso 1 1 d . . . 
H50B H 0.0375 0.5468 0.9528 0.034 Uiso 1 1 d . . . 
H60A H 0.313(5) 0.435(3) 1.000(4) 0.034 Uiso 1 1 d D . . 
H60B H 0.115(10) 0.4157(17) 0.959(4) 0.034 Uiso 1 1 d D . . 
H70A H 0.633(7) 0.423(2) 0.052(4) 0.034 Uiso 1 1 d D . . 
H70B H 0.476(10) 0.394(3) 0.0995(19) 0.034 Uiso 1 1 d D . . 
H40B H 0.9966 0.0467 1.0023 0.034 Uiso 1 1 d . . . 
H40A H 0.7997 0.0268 0.9966 0.034 Uiso 1 1 d . . . 
 
loop_ 
 _atom_site_aniso_label 
 _atom_site_aniso_U_11 
 _atom_site_aniso_U_22 
 _atom_site_aniso_U_33 
 _atom_site_aniso_U_23 
 _atom_site_aniso_U_13 
 _atom_site_aniso_U_12 
C1 0.012(3) 0.008(3) 0.012(3) 0.003(2) 0.000(2) 0.002(2) 
C2 0.013(3) 0.017(3) 0.015(3) 0.000(2) 0.002(2) 0.003(2) 
C3 0.026(3) 0.013(3) 0.016(3) -0.001(2) -0.001(2) 0.002(2) 
C4 0.032(4) 0.011(3) 0.020(3) 0.000(2) -0.009(3) -0.003(2) 
C5 0.014(3) 0.015(3) 0.029(3) 0.006(2) -0.002(2) -0.004(2) 
C6 0.013(3) 0.019(3) 0.016(3) 0.004(2) 0.003(2) 0.004(2) 
C7 0.015(3) 0.006(3) 0.014(3) -0.003(2) 0.000(2) 0.000(2) 
C8 0.014(3) 0.017(3) 0.007(2) -0.002(2) 0.002(2) 0.002(2) 
C9 0.008(3) 0.013(3) 0.018(3) 0.002(2) -0.003(2) -0.004(2) 
C10 0.019(3) 0.013(3) 0.013(3) 0.000(2) 0.000(2) 0.001(2) 
C11 0.016(3) 0.011(3) 0.013(3) -0.002(2) 0.000(2) -0.002(2) 
C12 0.015(3) 0.011(3) 0.016(3) 0.001(2) 0.003(2) -0.003(2) 
C13 0.014(3) 0.013(3) 0.017(3) 0.001(2) -0.003(2) 0.003(2) 
C14 0.012(3) 0.013(3) 0.019(3) 0.003(2) -0.005(2) -0.001(2) 
C15 0.024(3) 0.012(3) 0.013(3) 0.000(2) -0.001(2) -0.008(2) 
C16 0.013(3) 0.018(3) 0.012(3) 0.001(2) 0.003(2) -0.004(2) 
C17 0.008(3) 0.011(3) 0.013(3) 0.000(2) -0.001(2) 0.001(2) 
C21 0.013(3) 0.024(3) 0.014(3) 0.002(2) 0.002(2) 0.007(2) 
C22 0.014(3) 0.008(3) 0.019(3) 0.002(2) 0.001(2) -0.002(2) 
C23 0.011(3) 0.015(3) 0.022(3) -0.006(2) -0.002(2) 0.000(2) 
C24 0.014(3) 0.018(3) 0.014(3) 0.003(2) -0.004(2) -0.007(2) 
C25 0.016(3) 0.009(3) 0.020(3) 0.005(2) 0.003(2) -0.001(2) 
C26 0.015(3) 0.013(3) 0.016(3) -0.001(2) 0.002(2) 0.004(2) 
N11 0.0010(19) 0.011(2) 0.008(2) -0.0020(17) 0.0010(16) 0.0010(16) 
N12 0.016(2) 0.011(2) 0.013(2) 0.0002(18) -0.0013(18) -0.0056(19) 
N13 0.017(2) 0.011(2) 0.015(2) 0.0013(18) -0.0022(19) -0.0025(19) 
N22 0.009(2) 0.014(2) 0.015(2) 0.0013(18) 0.0036(18) 0.0002(18) 
N23 0.018(3) 0.016(2) 0.012(2) 0.0007(19) 0.0020(19) 0.006(2) 
O1 0.010(2) 0.022(2) 0.022(2) 0.0106(17) 0.0008(16) 0.0018(16) 
O2 0.0092(19) 0.022(2) 0.021(2) 0.0063(17) 0.0028(16) 0.0058(16) 
O3 0.018(2) 0.017(2) 0.019(2) 0.0002(16) 0.0029(16) 0.0075(17) 
O4 0.022(2) 0.023(2) 0.019(2) 0.0090(18) 0.0006(17) 0.0091(18) 
O10 0.022(2) 0.020(2) 0.018(2) 0.0033(17) 0.0017(17) 0.0041(17) 
O20 0.014(2) 0.028(2) 0.026(2) 0.0131(19) -0.0015(17) -0.0036(18) 
O30 0.045(3) 0.017(2) 0.025(2) -0.0015(18) 0.007(2) -0.006(2) 
O50 0.025(2) 0.023(2) 0.036(3) 0.006(2) 0.011(2) 0.0010(19) 
O60 0.017(2) 0.016(2) 0.040(3) 0.0005(19) -0.0004(19) -0.0021(18) 
O70 0.027(2) 0.031(3) 0.016(2) -0.0001(18) 0.0049(18) -0.005(2) 
P1 0.0081(7) 0.0129(7) 0.0149(7) -0.0006(5) -0.0012(5) -0.0015(5) 
P2 0.0123(7) 0.0143(7) 0.0201(7) -0.0008(6) 0.0022(6) -0.0016(6) 
Ag1 0.0082(2) 0.0134(2) 0.0154(2) 0.00094(16) -0.00146(15) -0.00224(16) 
Ag2 0.0151(2) 0.0187(2) 0.0212(2) 0.00326(18) -0.00091(17) -0.00736(17) 
O40 0.022(2) 0.017(2) 0.029(2) -0.0031(18) -0.0053(18) -0.0023(18) 
 
_geom_special_details 
; 
 All esds (except the esd in the dihedral angle between two l.s. planes) 
 are estimated using the full covariance matrix.  The cell esds are taken 
 into account individually in the estimation of esds in distances, angles 
 and torsion angles; correlations between esds in cell parameters are only 
 used when they are defined by crystal symmetry.  An approximate (isotropic) 
 treatment of cell esds is used for estimating esds involving l.s. planes. 
; 
 
loop_ 
 _geom_bond_atom_site_label_1 
 _geom_bond_atom_site_label_2 
 _geom_bond_distance 
 _geom_bond_site_symmetry_2 
 _geom_bond_publ_flag 
C1 C2 1.381(8) . ? 
C1 C6 1.410(8) . ? 
C1 C17 1.527(7) . ? 
C2 C3 1.389(8) . ? 
C2 H2 0.9500 . ? 
C3 C4 1.385(9) . ? 
C3 H3 0.9500 . ? 
C4 C5 1.372(9) . ? 
C4 H4 0.9500 . ? 
C5 C6 1.386(8) . ? 
C5 H5 0.9500 . ? 
C6 H6 0.9500 . ? 
C7 O1 1.252(7) . ? 
C7 O2 1.270(7) . ? 
C7 C8 1.519(7) . ? 
C8 C17 1.538(7) . ? 
C8 H8A 0.9900 . ? 
C8 H8B 0.9900 . ? 
C9 O3 1.247(7) . ? 
C9 O4 1.269(7) . ? 
C9 C10 1.513(8) . ? 
C10 C17 1.532(7) . ? 
C10 H10A 0.9900 . ? 
C10 H10B 0.9900 . ? 
C11 N11 1.483(7) . ? 
C11 P1 1.842(6) 1_455 ? 
C11 H11A 0.9900 . ? 
C11 H11B 0.9900 . ? 
C12 N12 1.478(7) . ? 
C12 P1 1.837(6) . ? 
C12 H12A 0.9900 . ? 
C12 H12B 0.9900 . ? 
C13 N13 1.479(7) . ? 
C13 P1 1.840(6) . ? 
C13 H13A 0.9900 . ? 
C13 H13B 0.9900 . ? 
C14 N12 1.469(7) 1_455 ? 
C14 N11 1.495(7) . ? 
C14 H14A 0.9900 . ? 
C14 H14B 0.9900 . ? 
C15 N13 1.469(7) . ? 
C15 N12 1.473(7) . ? 
C15 H15A 0.9900 . ? 
C15 H15B 0.9900 . ? 
C16 N13 1.460(7) 1_455 ? 
C16 N11 1.502(7) . ? 
C16 H16A 0.9900 . ? 
C16 H16B 0.9900 . ? 
C17 H17 1.0000 . ? 
C21 N21 1.490(8) . ? 
C21 P2 1.816(6) 1_455 ? 
C21 H21A 0.9900 . ? 
C21 H21B 0.9900 . ? 
C22 N22 1.480(7) . ? 
C22 P2 1.810(6) 1_455 ? 
C22 H22A 0.9900 . ? 
C22 H22B 0.9900 . ? 
C23 N23 1.474(7) . ? 
C23 P2 1.814(6) 1_455 ? 
C23 H23A 0.9900 . ? 
C23 H23B 0.9900 . ? 
C24 N22 1.473(7) . ? 
C24 N21 1.543(7) . ? 
C24 H24A 0.9900 . ? 
C24 H24B 0.9900 . ? 
C25 N23 1.466(7) . ? 
C25 N21 1.535(7) . ? 
C25 H25A 0.9900 . ? 
C25 H25B 0.9900 . ? 
C26 N22 1.477(7) . ? 
C26 N23 1.480(7) . ? 
C26 H26A 0.9900 . ? 
C26 H26B 0.9900 . ? 
N11 Ag1 2.429(4) . ? 
N12 C14 1.469(7) 1_655 ? 
N13 C16 1.460(7) 1_655 ? 
N21 Ag1 2.379(5) . ? 
N22 Ag2 2.477(4) . ? 
O1 Ag1 2.442(4) . ? 
O3 Ag2 2.220(4) 2_656 ? 
O10 H10C 0.904 . ? 
O10 H10D 0.953 . ? 
O20 H20A 0.98(2) . ? 
O20 H20B 0.98(2) . ? 
O30 H30A 0.877 . ? 
O30 H30B 0.906 . ? 
O50 H50A 0.922 . ? 
O50 H50B 0.976 . ? 
O60 H60A 0.99(2) . ? 
O60 H60B 0.98(2) . ? 
O70 H70A 0.99(2) . ? 
O70 H70B 0.99(2) . ? 
P1 C11 1.842(6) 1_655 ? 
P1 Ag1 2.3932(14) . ? 
P2 C22 1.810(6) 1_655 ? 
P2 C23 1.813(6) 1_655 ? 
P2 C21 1.816(6) 1_655 ? 
P2 Ag2 2.3240(15) . ? 
Ag2 O3 2.221(4) 2_646 ? 
O40 H40B 0.914 . ? 
O40 H40A 0.896 . ? 
 
loop_ 
 _geom_angle_atom_site_label_1 
 _geom_angle_atom_site_label_2 
 _geom_angle_atom_site_label_3 
 _geom_angle 
 _geom_angle_site_symmetry_1 
 _geom_angle_site_symmetry_3 
 _geom_angle_publ_flag 
C2 C1 C6 118.2(5) . . ? 
C2 C1 C17 121.2(5) . . ? 
C6 C1 C17 120.6(5) . . ? 
C1 C2 C3 121.4(5) . . ? 
C1 C2 H2 119.3 . . ? 
C3 C2 H2 119.3 . . ? 
C4 C3 C2 119.7(5) . . ? 
C4 C3 H3 120.1 . . ? 
C2 C3 H3 120.1 . . ? 
C5 C4 C3 119.8(5) . . ? 
C5 C4 H4 120.1 . . ? 
C3 C4 H4 120.1 . . ? 
C4 C5 C6 120.8(6) . . ? 
C4 C5 H5 119.6 . . ? 
C6 C5 H5 119.6 . . ? 
C5 C6 C1 120.1(5) . . ? 
C5 C6 H6 120.0 . . ? 
C1 C6 H6 119.9 . . ? 
O1 C7 O2 123.7(5) . . ? 
O1 C7 C8 118.2(5) . . ? 
O2 C7 C8 118.1(5) . . ? 
C7 C8 C17 115.3(4) . . ? 
C7 C8 H8A 108.4 . . ? 
C17 C8 H8A 108.4 . . ? 
C7 C8 H8B 108.4 . . ? 
C17 C8 H8B 108.4 . . ? 
H8A C8 H8B 107.5 . . ? 
O3 C9 O4 124.8(5) . . ? 
O3 C9 C10 119.3(5) . . ? 
O4 C9 C10 115.8(5) . . ? 
C9 C10 C17 115.9(5) . . ? 
C9 C10 H10A 108.3 . . ? 
C17 C10 H10A 108.3 . . ? 
C9 C10 H10B 108.3 . . ? 
C17 C10 H10B 108.3 . . ? 
H10A C10 H10B 107.4 . . ? 
N11 C11 P1 113.8(4) . 1_455 ? 
N11 C11 H11A 108.8 . . ? 
P1 C11 H11A 108.8 1_455 . ? 
N11 C11 H11B 108.8 . . ? 
P1 C11 H11B 108.8 1_455 . ? 
H11A C11 H11B 107.7 . . ? 
N12 C12 P1 112.7(4) . . ? 
N12 C12 H12A 109.1 . . ? 
P1 C12 H12A 109.1 . . ? 
N12 C12 H12B 109.1 . . ? 
P1 C12 H12B 109.1 . . ? 
H12A C12 H12B 107.8 . . ? 
N13 C13 P1 111.8(4) . . ? 
N13 C13 H13A 109.3 . . ? 
P1 C13 H13A 109.3 . . ? 
N13 C13 H13B 109.3 . . ? 
P1 C13 H13B 109.3 . . ? 
H13A C13 H13B 107.9 . . ? 
N12 C14 N11 114.3(4) 1_455 . ? 
N12 C14 H14A 108.7 1_455 . ? 
N11 C14 H14A 108.7 . . ? 
N12 C14 H14B 108.7 1_455 . ? 
N11 C14 H14B 108.7 . . ? 
H14A C14 H14B 107.6 . . ? 
N13 C15 N12 114.6(4) . . ? 
N13 C15 H15A 108.6 . . ? 
N12 C15 H15A 108.6 . . ? 
N13 C15 H15B 108.6 . . ? 
N12 C15 H15B 108.6 . . ? 
H15A C15 H15B 107.6 . . ? 
N13 C16 N11 114.7(4) 1_455 . ? 
N13 C16 H16A 108.6 1_455 . ? 
N11 C16 H16A 108.6 . . ? 
N13 C16 H16B 108.6 1_455 . ? 
N11 C16 H16B 108.6 . . ? 
H16A C16 H16B 107.6 . . ? 
C1 C17 C10 113.2(4) . . ? 
C1 C17 C8 112.3(4) . . ? 
C10 C17 C8 107.8(4) . . ? 
C1 C17 H17 107.8 . . ? 
C10 C17 H17 107.8 . . ? 
C8 C17 H17 107.8 . . ? 
N21 C21 P2 115.2(4) . 1_455 ? 
N21 C21 H21A 108.5 . . ? 
P2 C21 H21A 108.5 1_455 . ? 
N21 C21 H21B 108.5 . . ? 
P2 C21 H21B 108.5 1_455 . ? 
H21A C21 H21B 107.5 . . ? 
N22 C22 P2 112.5(4) . 1_455 ? 
N22 C22 H22A 109.1 . . ? 
P2 C22 H22A 109.1 1_455 . ? 
N22 C22 H22B 109.1 . . ? 
P2 C22 H22B 109.1 1_455 . ? 
H22A C22 H22B 107.8 . . ? 
N23 C23 P2 112.4(4) . 1_455 ? 
N23 C23 H23A 109.1 . . ? 
P2 C23 H23A 109.1 1_455 . ? 
N23 C23 H23B 109.1 . . ? 
P2 C23 H23B 109.1 1_455 . ? 
H23A C23 H23B 107.8 . . ? 
N22 C24 N21 114.8(4) . . ? 
N22 C24 H24A 108.6 . . ? 
N21 C24 H24A 108.6 . . ? 
N22 C24 H24B 108.6 . . ? 
N21 C24 H24B 108.6 . . ? 
H24A C24 H24B 107.5 . . ? 
N23 C25 N21 115.0(4) . . ? 
N23 C25 H25A 108.5 . . ? 
N21 C25 H25A 108.5 . . ? 
N23 C25 H25B 108.5 . . ? 
N21 C25 H25B 108.5 . . ? 
H25A C25 H25B 107.5 . . ? 
N22 C26 N23 113.6(4) . . ? 
N22 C26 H26A 108.9 . . ? 
N23 C26 H26A 108.9 . . ? 
N22 C26 H26B 108.9 . . ? 
N23 C26 H26B 108.9 . . ? 
H26A C26 H26B 107.7 . . ? 
C11 N11 C14 110.3(4) . . ? 
C11 N11 C16 110.0(4) . . ? 
C14 N11 C16 107.1(4) . . ? 
C11 N11 Ag1 111.3(3) . . ? 
C14 N11 Ag1 113.4(3) . . ? 
C16 N11 Ag1 104.5(3) . . ? 
C14 N12 C15 108.2(4) 1_655 . ? 
C14 N12 C12 111.9(4) 1_655 . ? 
C15 N12 C12 110.6(4) . . ? 
C16 N13 C15 108.4(4) 1_655 . ? 
C16 N13 C13 111.7(4) 1_655 . ? 
C15 N13 C13 111.4(4) . . ? 
C21 N21 C25 108.9(4) . . ? 
C21 N21 C24 109.0(4) . . ? 
C25 N21 C24 105.0(4) . . ? 
C21 N21 Ag1 115.4(4) . . ? 
C25 N21 Ag1 106.6(3) . . ? 
C24 N21 Ag1 111.4(3) . . ? 
C24 N22 C26 109.0(4) . . ? 
C24 N22 C22 111.7(4) . . ? 
C26 N22 C22 110.7(4) . . ? 
C24 N22 Ag2 110.4(3) . . ? 
C26 N22 Ag2 105.5(3) . . ? 
C22 N22 Ag2 109.3(3) . . ? 
C25 N23 C23 111.5(4) . . ? 
C25 N23 C26 108.9(4) . . ? 
C23 N23 C26 111.4(4) . . ? 
C7 O1 Ag1 107.6(3) . . ? 
C9 O3 Ag2 122.1(4) . 2_656 ? 
H10C O10 H10D 100.4 . . ? 
H20A O20 H20B 102(6) . . ? 
H30A O30 H30B 116.1 . . ? 
H50A O50 H50B 92.7 . . ? 
H60A O60 H60B 107(6) . . ? 
H70A O70 H70B 106(6) . . ? 
C12 P1 C13 98.5(3) . . ? 
C12 P1 C11 97.4(3) . 1_655 ? 
C13 P1 C11 98.5(3) . 1_655 ? 
C12 P1 Ag1 122.22(18) . . ? 
C13 P1 Ag1 118.19(18) . . ? 
C11 P1 Ag1 117.39(18) 1_655 . ? 
C22 P2 C23 99.1(3) 1_655 1_655 ? 
C22 P2 C21 99.2(3) 1_655 1_655 ? 
C23 P2 C21 98.2(3) 1_655 1_655 ? 
C22 P2 Ag2 120.89(18) 1_655 . ? 
C23 P2 Ag2 117.77(19) 1_655 . ? 
C21 P2 Ag2 117.50(19) 1_655 . ? 
N21 Ag1 P1 126.85(13) . . ? 
N21 Ag1 N11 111.48(16) . . ? 
P1 Ag1 N11 114.63(10) . . ? 
N21 Ag1 O1 97.82(16) . . ? 
P1 Ag1 O1 108.31(10) . . ? 
N11 Ag1 O1 88.40(14) . . ? 
O3 Ag2 P2 145.13(11) 2_646 . ? 
O3 Ag2 N22 91.35(15) 2_646 . ? 
P2 Ag2 N22 117.70(11) . . ? 
H40B O40 H40A 107.0 . . ? 
 
loop_ 
 _geom_hbond_atom_site_label_D 
 _geom_hbond_atom_site_label_H 
 _geom_hbond_atom_site_label_A 
 _geom_hbond_distance_DH 
 _geom_hbond_distance_HA 
 _geom_hbond_distance_DA 
 _geom_hbond_angle_DHA 
 _geom_hbond_site_symmetry_A 
O10 H10C O2  0.904 1.919 2.818(6) 173 . 
O10 H10D N12  0.953 1.941 2.882(6) 169.1(3) 4_565 
O20 H20A O2  0.98(2) 1.79(2) 2.768(6) 175(7) 1_455 
O20 H20B O1  0.98(2) 1.86(3) 2.812(6) 162(6) . 
O30 H30A O40  0.877 1.975 2.850(6) 175 . 
O50 H50A O60  0.922 1.840 2.737(6) 164 . 
O60 H60A O70  0.99(2) 1.82(3) 2.783(6) 164(7) 1_556 
O70 H70A O50  0.99(2) 1.78(2) 2.769(6) 175(7) 3_666 
O70 H70B N23  0.99(2) 1.87(2) 2.850(6) 171(7) 4_565 
O40 H40B O4  0.914 1.909 2.817(6) 172.4(3) 4_666 
O40 H40A O4  0.896 1.859 2.726(6) 162.3(3) 2_646 
 
_diffrn_measured_fraction_theta_max    0.999 
_diffrn_reflns_theta_full              25.35 
_diffrn_measured_fraction_theta_full   0.999 
_refine_diff_density_max    3.886 
_refine_diff_density_min   -1.320 
_refine_diff_density_rms    0.129 
